# Supplementary material for: Role of the SAF-A SAP domain in X inactivation, transcription, splicing, and cell proliferation
Source: PubMed Central journal article supplement — bioRxiv. 2024 Sep 10:2024.09.09.612041. Preprint. [Version 2] doi: 10.1101/2024.09.09.612041 (PMC11419091; doi:10.1101/2024.09.09.612041), 2024-09-10

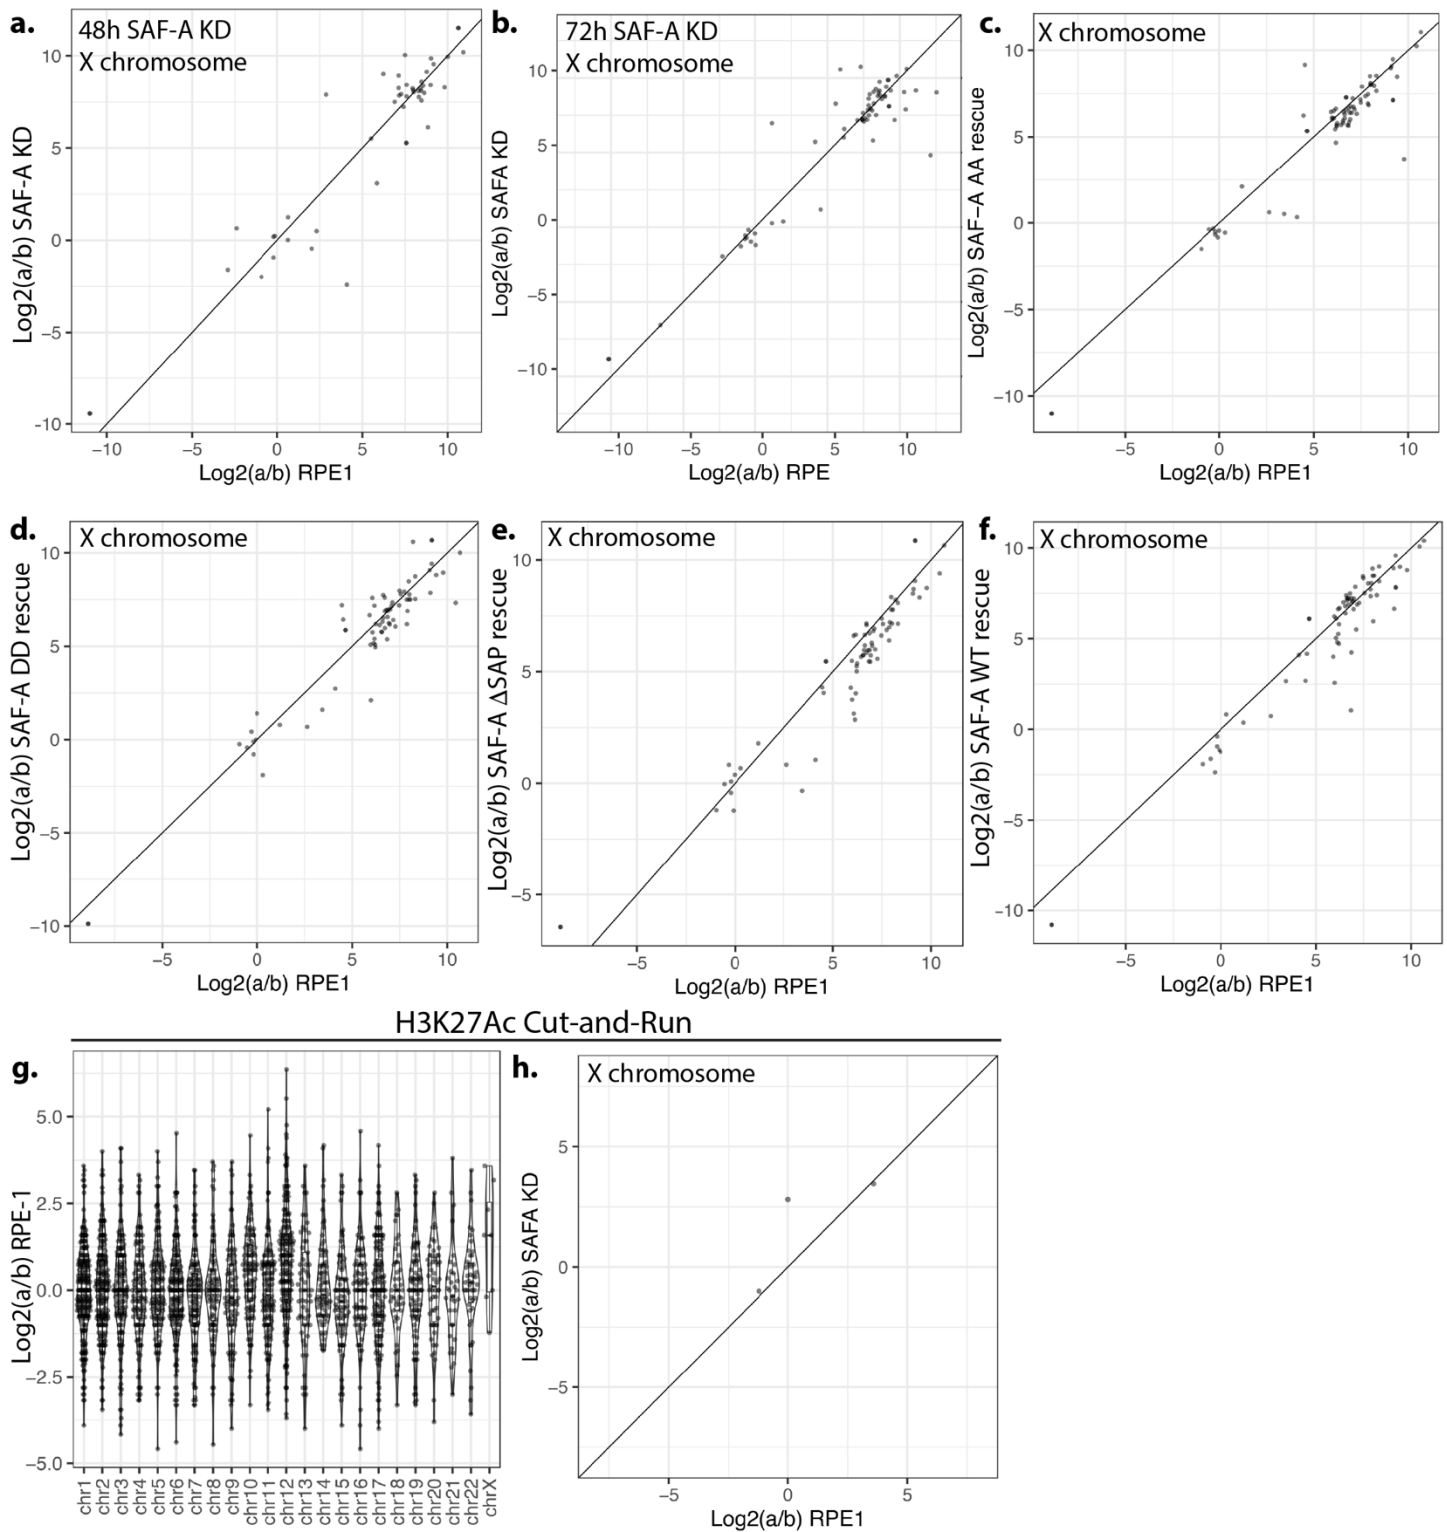

**Supplemental Figure 1. Analysis of X-linked chromatin and gene expression in SAF-A mutants.** A. Comparison of 'a/b' ratios for all X-linked genes after 48 hours of SAF-A KD. B. Comparison of 'a/b' ratios for all X-linked genes after 72 hours of SAF-A depletion. C-F. Comparison of 'a/b' ratios for all X-linked genes after in all SAF-A SAP domain mutants. G. Allele-specific Cut-and-Run was performed with H3K27Ac antibodies and calculated using PAC. 'a/b' ratios are plotted for each gene by chromosome. H. Comparison of 'a/b' ratios for X linked genes in SAF-A depleted cells.

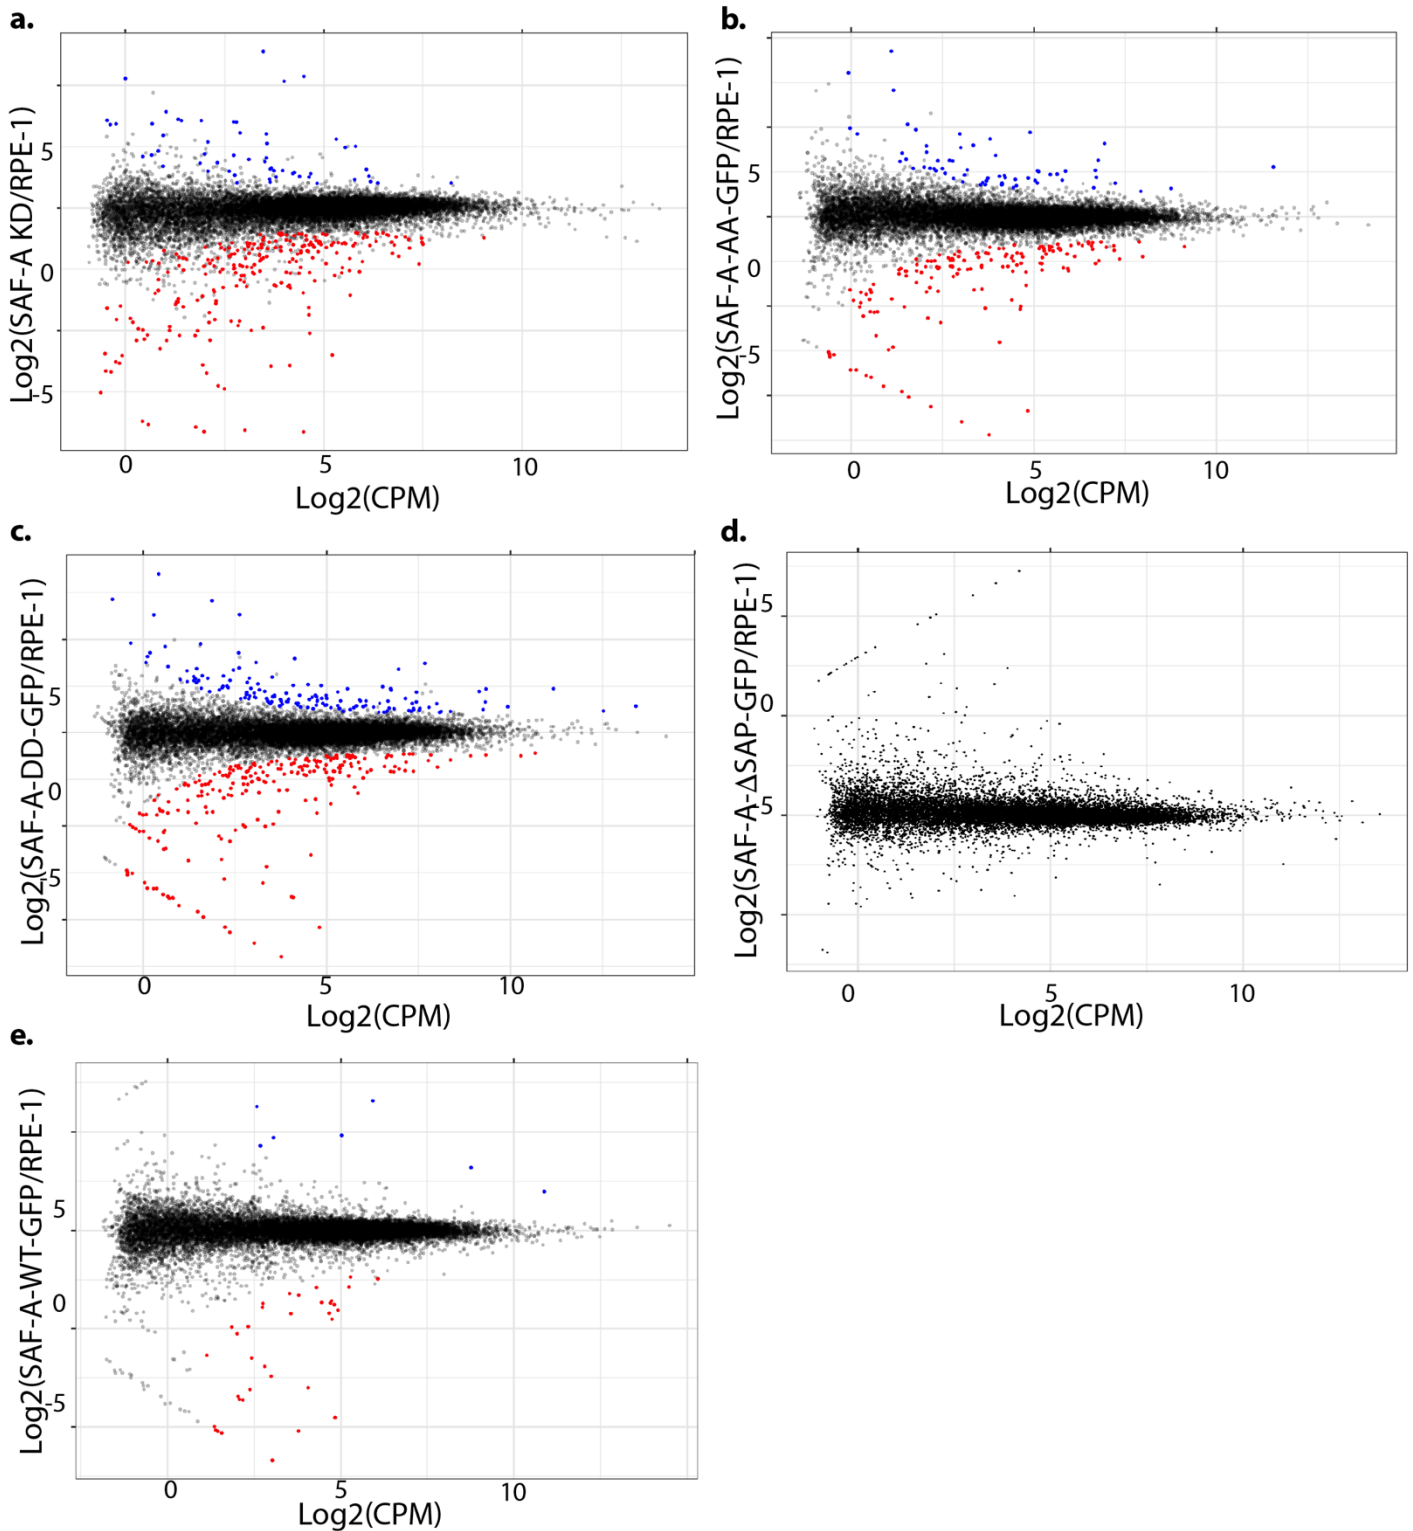

**Supplemental Figure 2. SAF-A mutants do not alter gene expression at 24 hours.** A-E. SAF-A was depleted by auxin addition and various mutants were expressed by the addition of doxycycline. Gene expression was evaluated at 24 hours using RNA-seq and EdgeR. MD plots depict significantly differentially expressed genes for each mutant (FDR < 0.01).

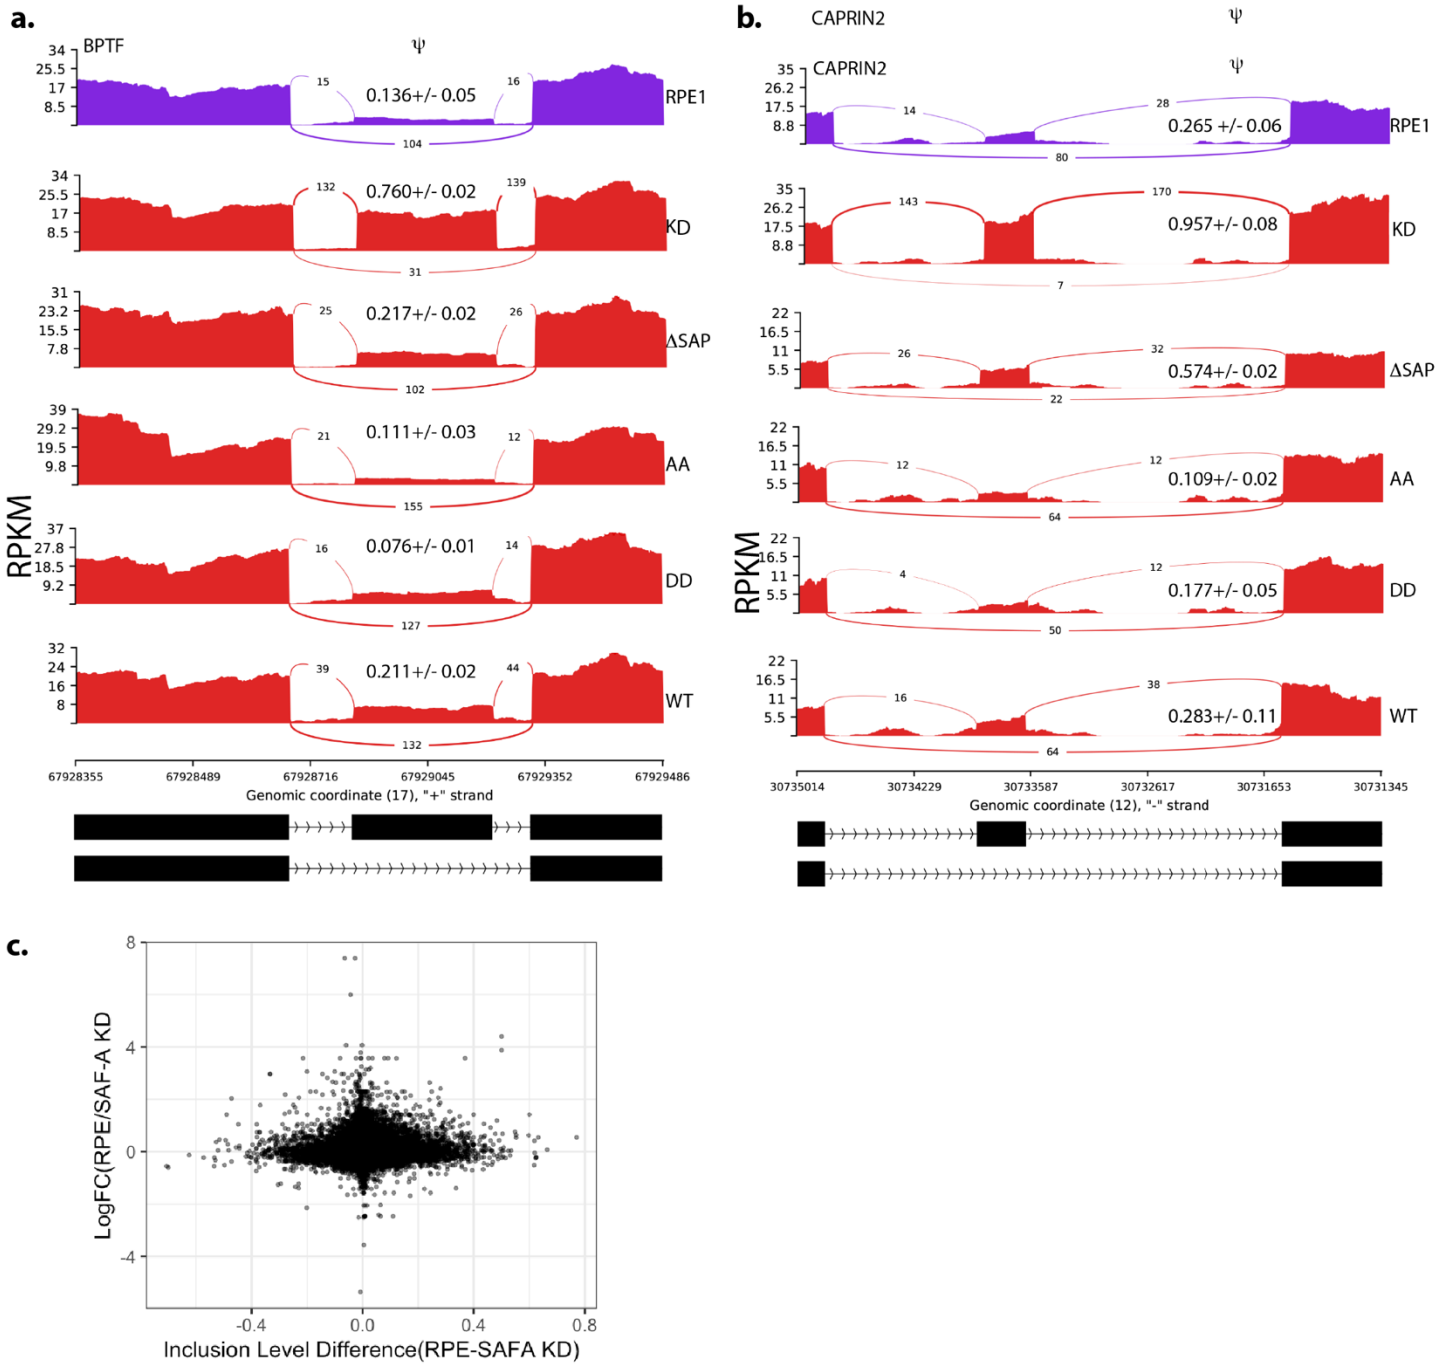

**Supplemental Figure 3. MISO plots of additional regulated exons in each SAF-A mutant. A-B.** MISO plots of SE events in WT RPE-1 cells, SAF-A depleted cells, and SAP domain mutants. **C.** Scatterplot comparison of changes in gene expression at 24h to changes in mRNA splicing.

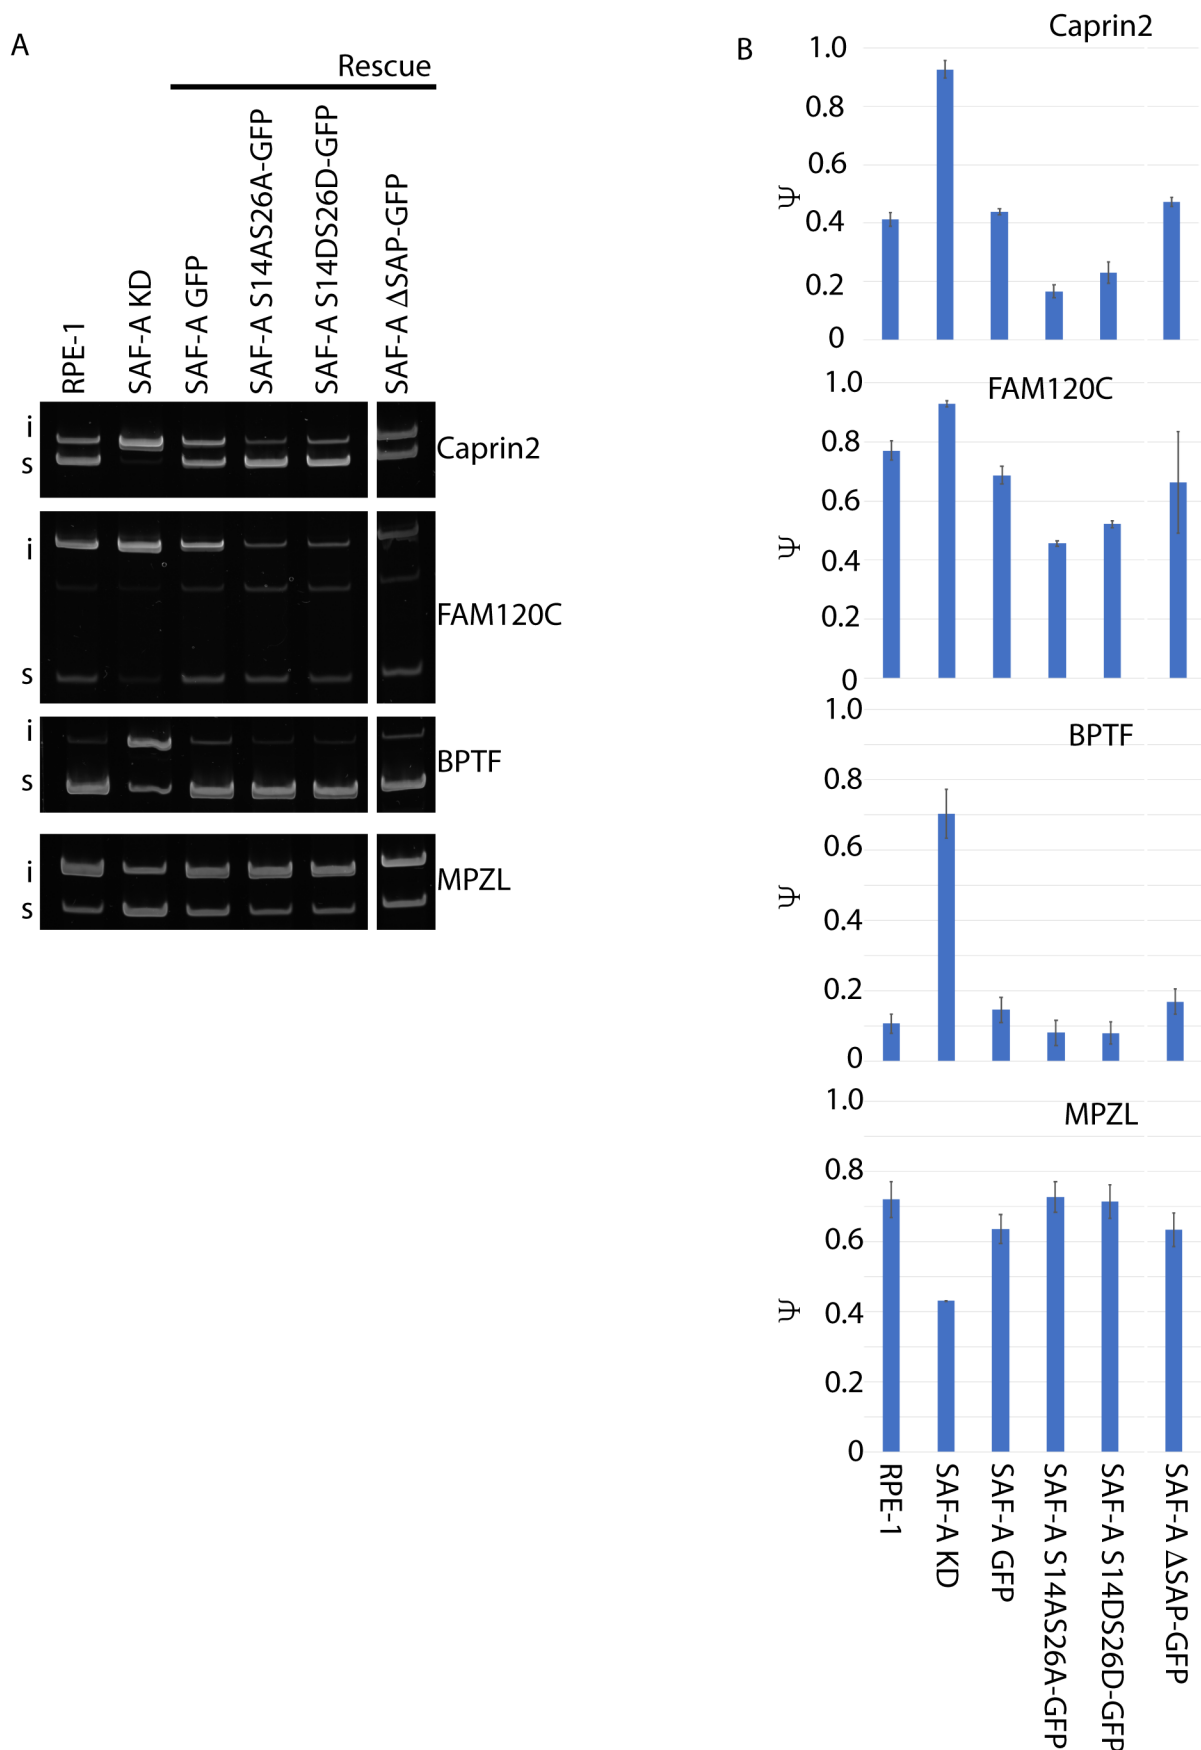

**Supplemental Figure 4. Validation of predicted splicing changes using RT-PCR. A.** PAGE gel analysis of exon inclusion for 4 different genes with predicted changes in exon inclusion in SAF-A depleted cells. **B.** Quantitation of percentage spliced-in in each mutant from three biological replicates.

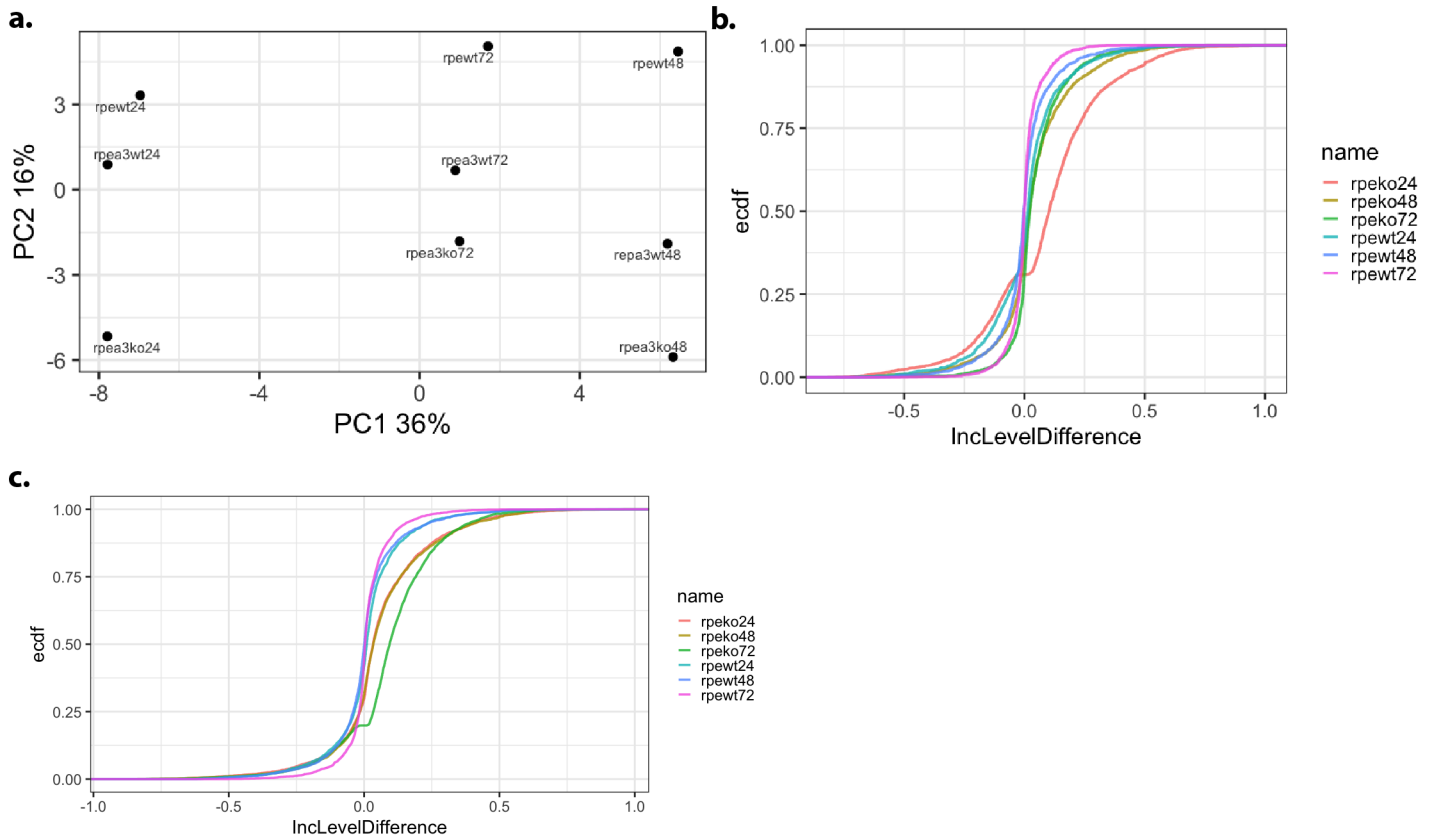

**Supplemental Figure 5. Splicing defects do not increase with time of SAF-A depletion.** A. PCA analysis of skipped exons in SAF-A KD, RPE-1, and SAF-A KD + SAF-A-GFP WT at each time point. B. CDF analysis of SE altered in SAF-A KD cells at 24 hours in each cell type at each time point. C. Same analysis as in B but with SE significantly altered in SAF-A KD at 72 hours.

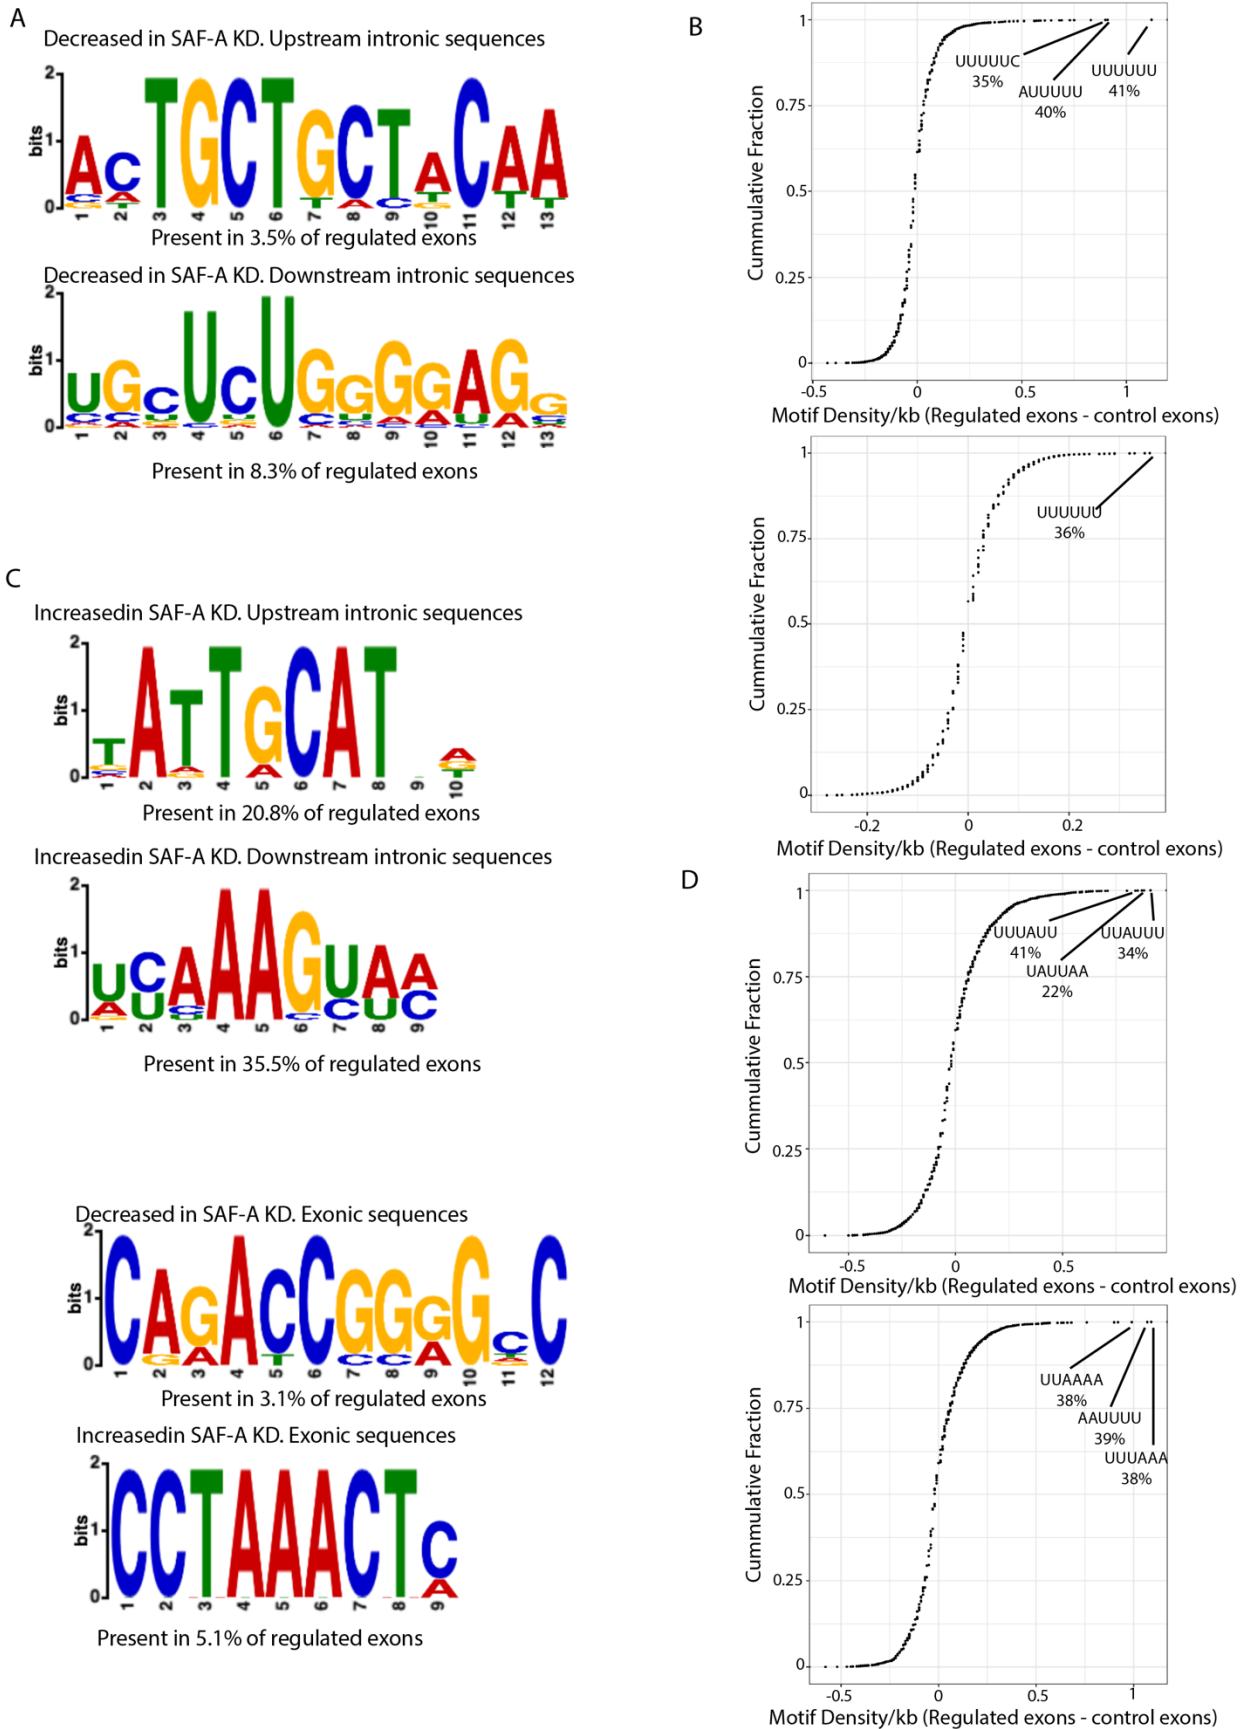

**Supplemental Figure 6. Motif analysis of SAF-A regulated exons.** A. STREME analysis of upstream and downstream intronic sequences surrounding SAF-A regulated exons. B. Hexamer enrichment in the same sequences as in A. C. C-D STREME and hexamer analysis of sequences in and surrounding SAF-A regulated exons. Sequence sets tested are indicated on the plots.

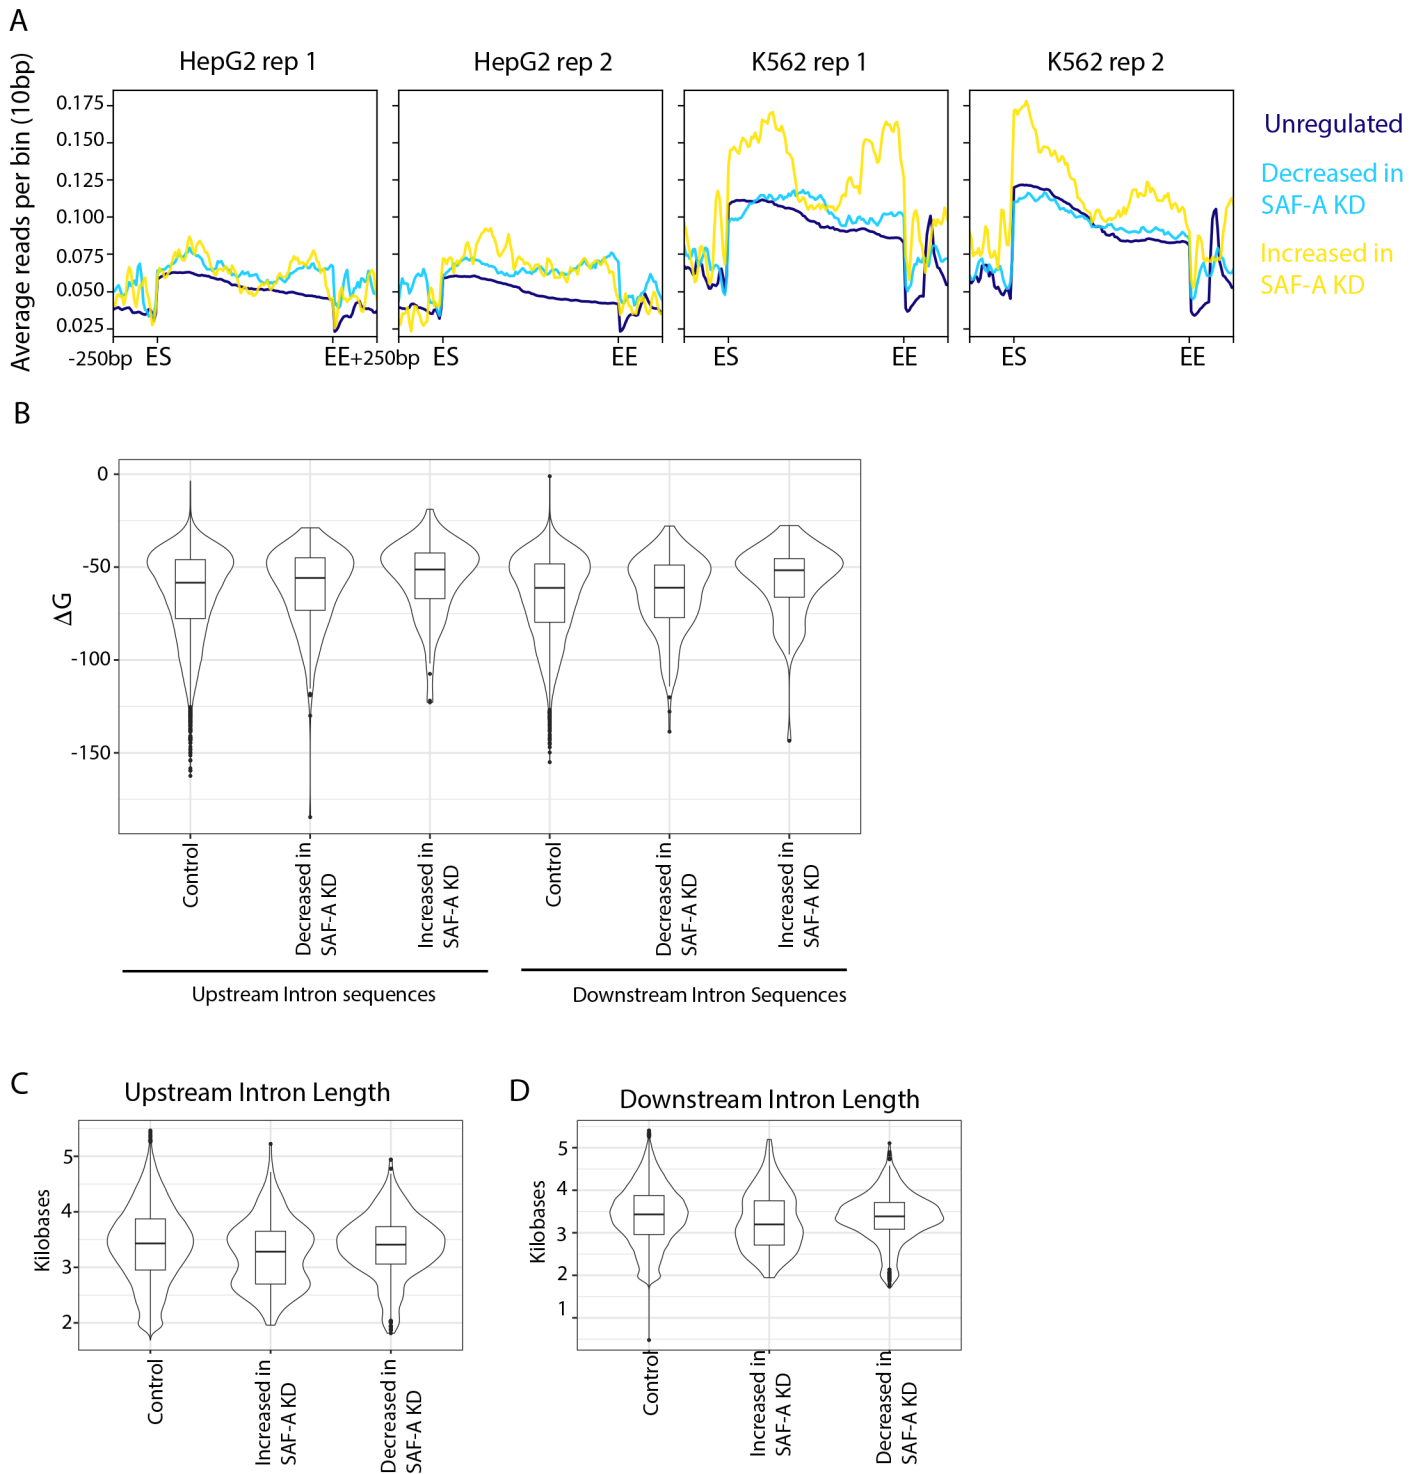

Supplement: NIHPP2024.09.09.612041V2-supplement-1.pdf [file NIHPP2024.09.09.612041V2-supplement-1.pdf]
